# Supplementary material for: Long non-coding RNA Loc105611671 promotes the proliferation of ovarian granulosa cells and steroid hormone production upregulation of CDC42
Source: Front Vet Sci. 2024 Mar 4;11:1366759. doi: 10.3389/fvets.2024.1366759 (PMC10944914; doi:10.3389/fvets.2024.1366759)
Supplement: Supplementary file 1 [file Table_1.XLSX]

## Sheet: Sheet1
Primer for Quantitative Real-time PCR
Gene	PrimerSequence(5’-3’)
Loc105611671	F: ACTGCCTTCATCACTGGACACAAC
	R: TCTGAAACCAACTGCCGCTTCC
GAPDH	F: CGGCACAGTCAAGGCAGAGAAC
	R: CACGTACTCAGCACCAGCATCAC
CDC42	F: GCTGTCAAGTATGTGGAGTGCTCTG
	R: CTGCGGCTCTTCTTCGGTTCTG
PCNA	F: GGTCCAGGGCTCCATCTTGAAG
	R: GACGAGTCCATGCTCTGTAGGTTC
CDK1	F: GCTCGCTACTCAACTCCAGTGG
	R: AGTGCCCAAAGCTCTGAAAATTCTG
P21	F: TTCTCACCTTCTCGCAGTATTCCAG
	R: AAACGGCTCCAGATCATCTCCATAG
STAR	F: GGTGCTGAGTAAAGTGATCC
	R: CATCTCCTCGTAGAGTGTGG
Cyp11a1	F: ACCCATCGGAGTCCTGTTTAAGAAG
	R: TTATTGCCTCTGGAGCCATCACC
Cyp19a1	F: GTGTCCGAAGTTGTGCCTATTGC
	R: CTGGGACCTGGTATTGAGGATGTG
XIST	F: AAACATGGCGGGCTTTTGTC
	R: TCTAACGCTGCCAATCCCTC
ACTB	F: CCAAGGCCAACCGTGAGAAG
	R: CCATCTCCTGCTTCGAAGTCC
