# Supplementary material for: Long non-coding RNA Loc105611671 promotes the proliferation of ovarian granulosa cells and steroid hormone production upregulation of CDC42
Source: Front Vet Sci. 2024 Mar 4;11:1366759. doi: 10.3389/fvets.2024.1366759 (PMC10944914; doi:10.3389/fvets.2024.1366759)
Supplement: Supplementary file 2 [file Table_2.XLSX]

## Sheet: Sheet1
Table 1 Specific binding proteins
Total	%Cov(95)	Citable Accession	Gene name	Species
55.86	60.64	W5PRA1	ACTG2	SHEEP
31.38	32.97	F2YQ13	GSN	SHEEP
24	17.93	W5Q4S0	COL3A1	SHEEP
23.9	62.15	W5PK27	MYL6	SHEEP
16.17	5.429	W5PQK6	TLN1	SHEEP
13.44	52.63	W5PL19	MYL12B	SHEEP
10.13	9.003	A9P323	HSPCA	SHEEP
9.06	23.12	W5PZ59	MACROH2A1	SHEEP
8.17	3.543	W5Q4W6	TJP1	SHEEP
8.04	38.69	W5NTJ3	LOC101113632	SHEEP
6.86	7.94	W5Q4E1	HSP90B1	SHEEP
6.21	12.44	W5Q5K4	LOC101106166	SHEEP
6	16.15	W5PK26	LASP1	SHEEP
6	19.9	W5P4R9	EMD	SHEEP
5.77	7.904	W5NUQ7	LARP7	SHEEP
5.65	3.35	W5PFV7	COPA	SHEEP
5.51	7.84	W5P1D8	HNRNPM	SHEEP
5.33	5.365	W5P2J3	SRP72	SHEEP
5.15	1.799	W5QI12	TLN2	SHEEP
5.1	7.559	W5Q2G6	HNRNPK	SHEEP
4.66	12.69	W5QBJ0	ANXA3	SHEEP
4.64	4.534	W5PWW0	TAF3	SHEEP
4.57	11.27	W5PJG7	CALR	SHEEP
4.37	10.68	W5PPH6	RPS3	SHEEP
4.15	5.929	W5PR35	DDX18	SHEEP
4.07	4.102	W5PHR3	ADD3	SHEEP
4.06	1.341	W5P563	MAP1B	SHEEP
4	4.044	W5Q8Q7	RPN2	SHEEP
4	4.407	W5PP28	EHD2	SHEEP
4	6.186	W5Q4W8	HSPA9	SHEEP
4	15.58	W5PAN7	MYL3	SHEEP
3.82	7.692	D8X187	SERPINB1	SHEEP
3.62	9.47	W5QE85	RPS3A	SHEEP
3.6	1.081	W5PU43	SON	SHEEP
3.41	18.71	W5NX91	RPS27A	SHEEP
3.32	14.22	W5P214	TAGLN	SHEEP
2.95	12.23	W5PQR5	RPL18	SHEEP
2.81	3.96	W5P875	TTF1	SHEEP
2.68	18.94	W5QFG9	--	SHEEP
2.66	5.41	W5Q1L2	--	SHEEP
2.59	4.784	W5PZI1	LOC101113728	SHEEP
2.59	14.62	W5QF77	--	SHEEP
2.53	3.089	W5Q3Z7	PUF60	SHEEP
2.51	6.983	W5Q8S1	--	SHEEP
2.47	8.451	W5PKD3	GNAI2	SHEEP
2.45	7.66	W5PDJ5	PAFAH1B3	SHEEP
2.34	2.974	W5Q9H1	ZYX	SHEEP
2.28	2.632	W5NQ46	FGB	SHEEP
2.22	1.742	W5Q1W7	PALLD	SHEEP
2.21	3.457	W5PW05	MDH2	SHEEP
2.2	4.094	W5Q2E1	LUM	SHEEP
2.17	3.435	W5Q8J9	LOC101102787	SHEEP
2.17	6.25	W5P7Z1	--	SHEEP
2.15	10.71	W5PJY3	LOC114116858	SHEEP
2.15	8.861	P68253	YWHAG	SHEEP
2.14	1.171	W5NW35	MYOF	SHEEP
2.14	2.054	W5PCK4	HNRNPR	SHEEP
2.11	5.882	W5NZ96	--	SHEEP
2.08	1.278	W5NVY1	NUP98	SHEEP
2.02	2.036	W5PVZ5	FTSJ3	SHEEP
2.02	3.349	W5P4C7	SEPTIN7	SHEEP
2.01	2.381	W5Q1Z7	PRPF19	SHEEP
2.01	3.987	W5QCI3	CYB5R3	SHEEP
2.01	6.25	W5NWF6	SFRP1	SHEEP
2.01	6.087	W5QDF4	GSTM3	SHEEP
2	7.471	W5NQC8	RPL27A	SHEEP
2	0.4104	W5PNV5	GCN1	SHEEP
2	0.9029	W5QIX1	KTN1	SHEEP
2	0.9265	W5PQF8	EPRS1	SHEEP
2	1.308	W5PVL5	HSPA4	SHEEP
2	1.419	W5PLP3	SMARCA5	SHEEP
2	1.608	W5NVZ1	MPRIP	SHEEP
2	1.635	W5NXB5	MAP4	SHEEP
2	1.635	W5P7B4	DHX15	SHEEP
2	1.741	W5Q366	SUN2	SHEEP
2	1.754	W5NY25	EIF3C	SHEEP
2	1.831	W5PNX6	PREP	SHEEP
2	1.916	W5QAA9	ACO2	SHEEP
2	1.982	W5PQF7	STXBP1	SHEEP
2	1.982	W5PIU4	EPHX2	SHEEP
2	2.055	W5PKQ1	SORBS3	SHEEP
2	2.09	W5QCX7	MYBBP1A	SHEEP
2	2.328	W5PN88	EEF2	SHEEP
2	2.534	W5PW68	--	SHEEP
2	2.571	A8IF71	--	SHEEP
2	2.657	W5QCD6	IDH1	NADP
2	2.846	W5NYL0	MAOA	SHEEP
2	2.878	W5Q124	SERPINA3	SHEEP
2	3.05	W5Q5G8	TKT	SHEEP
2	3.215	W5P6C3	DDX41	SHEEP
2	3.238	W5PZQ6	RBM39	SHEEP
2	3.44	W5PYK0	EIF4A1	SHEEP
2	3.478	W5PIF9	TGFB1I1	SHEEP
2	3.564	W5PQL2	SRSF11	SHEEP
2	3.586	W5NQM8	CTTN	SHEEP
2	3.608	W5Q0T0	--	SHEEP
2	4.112	W5QGG6	CCT2	SHEEP
2	4.155	Q4LBE3	ovar-MHCI-C6	SHEEP
2	4.509	W5P4F9	PRKAR2B	SHEEP
2	4.624	W5PC89	POLR1C	SHEEP
2	5.106	W5QH26	EBNA1BP2	SHEEP
2	5.535	W5QBF8	CAVIN3	SHEEP
2	5.727	W5PWD4	--	SHEEP
2	5.731	O46544	C3	SHEEP
2	5.851	W5NSM1	ACTR1A	SHEEP
2	6.355	W5PEL2	OGN	SHEEP
2	6.452	W5Q6B9	--	SHEEP
2	6.548	W5P824	ARPC4	SHEEP
2	6.809	W5PSQ7	--	SHEEP
2	7.173	W5PE11	CDC42	SHEEP
2	8.271	W5PT12	FAU	SHEEP
2	13.12	W5PBP1	RPS14	SHEEP
2	13.73	W5Q482	--	SHEEP
2	14.81	W5PWZ2	LGALS1	SHEEP
2	15.63	W5NY51	LLPH	SHEEP
2	4.237	W5PEQ9	SRSF1	SHEEP
1.84	6.618	W5P169	LOC101115386	SHEEP
1.83	7.895	K4P490	SERPINH1	SHEEP
1.77	1.317	W5P1C0	TRIM28	SHEEP
1.77	1.884	W5P5S7	PDLIM7	SHEEP
1.74	1.906	W5P765	CCT3	SHEEP
1.68	7.692	W5Q675	RPS2	SHEEP
1.67	1.761	W5P8Z8	SRRM1	SHEEP
1.66	6.145	W5PUM6	SEC11A	SHEEP
1.62	1.075	W5PJP6	SMARCC2	SHEEP
1.62	2.92	W5PZK0	SMARCE1	SHEEP
1.6	2.424	W5PYS9	RARS1	SHEEP
1.57	2.726	W5PKD0	SACM1L	SHEEP
1.55	2.679	W5PSC8	FBLN5	SHEEP
1.55	1.379	W5PI32	AMOTL1	SHEEP
1.53	4.595	W5NWM2	APOA4	SHEEP
1.46	0.9465	W5Q8K0	RBBP6	SHEEP
