# Supplementary material for: Long non-coding RNA Loc105611671 promotes the proliferation of ovarian granulosa cells and steroid hormone production upregulation of CDC42
Source: Front Vet Sci. 2024 Mar 4;11:1366759. doi: 10.3389/fvets.2024.1366759 (PMC10944914; doi:10.3389/fvets.2024.1366759)
Supplement: Supplementary file 3 [file Table_3.XLSX]

## Sheet: Sheet1
Candidate binding protein for the reproductive signalling pathway KEGG
Term	ID	Input number	Input	Hyperlink
Cell cycle - Ovis aries (sheep)	oas04110	1	P68253	http://www.genome.jp/kegg-bin/show_pathway?map=oas04110&multi_query=oas:101116012+red,green%0d%0a
Estrogen signaling pathway - Ovis aries (sheep)	oas04915	3	W5Q4E1;W5PKD3;A9P323	http://www.genome.jp/kegg-bin/show_pathway?map=oas04915&multi_query=oas:100302341+red,green%0d%0aoas:100127209+red,green%0d%0aoas:101111703+red,green%0d%0a
GnRH signaling pathway - Ovis aries (sheep)	oas04912	1	W5PE11	http://www.genome.jp/kegg-bin/show_pathway?map=oas04912&multi_query=oas:114108599+red,green%0d%0a
MAPK signaling pathway - Ovis aries (sheep)	oas04010	1	W5PE11	http://www.genome.jp/kegg-bin/show_pathway?map=oas04010&multi_query=oas:114108599+red,green%0d%0a
Oocyte meiosis - Ovis aries (sheep)	oas04114	1	P68253	http://www.genome.jp/kegg-bin/show_pathway?map=oas04114&multi_query=oas:101116012+red,green%0d%0a
PI3K-Akt signaling pathway - Ovis aries (sheep)	oas04151	3	P68253;W5Q4E1;A9P323	http://www.genome.jp/kegg-bin/show_pathway?map=oas04151&multi_query=oas:100127209+red,green%0d%0aoas:101116012+red,green%0d%0aoas:101111703+red,green%0d%0a
Progesterone-mediated oocyte maturation - Ovis aries (sheep)	oas04914	2	W5PKD3;A9P323	http://www.genome.jp/kegg-bin/show_pathway?map=oas04914&multi_query=oas:100302341+red,green%0d%0aoas:100127209+red,green%0d%0a
Wnt signaling pathway - Ovis aries (sheep)	oas04310	1	W5NWF6	http://www.genome.jp/kegg-bin/show_pathway?map=oas04310&multi_query=oas:101121066+red,green%0d%0a
